# Supplementary material for: Colour as a backup for scent in the presence of olfactory noise: testing the efficacy backup hypothesis using bumblebees (Bombus terrestris)
Source: PubMed Central journal article supplement (PMC5717666; doi:10.1098/rsos.170996), 2017-11-29
Supplement: rsos170996supp1.pdf [file rsos170996supp1.pdf]

## Supplementary Materials

Table S1. Experimental components of conditions used within the chemical interference experiment detailing the presence or absence of visual or scent flower components as well as the presence of chemical interference.

| Group | Condition                                                         | Scented Flowers | Chemical interference | Visual Cue | <i>n</i>                                                                  |
|-------|-------------------------------------------------------------------|-----------------|-----------------------|------------|---------------------------------------------------------------------------|
| A     | No chemical interference and unimodal scented flowers             | ✓               | ✗                     | ✗          | 18 (Colony C: 6, Colony D: 12)                                            |
| B     | With chemical interference and unimodal scented flowers           | ✓               | ✓                     | ✗          | 18 (Colony C: 4, Colony D: 14)                                            |
| C     | With chemical interference and bimodal scented and visual flowers | ✓               | ✓                     | ✓          | 18 (Colony D: 18)                                                         |
| D     | With chemical interference and unimodal visual flowers            | ✗               | ✓                     | ✓          | 18 (Colony CCC: 4, Colony DD: 8, Colony F: 1, Colony: E 4, Colony CCC: 1) |

Table S2. Experimental components of conditions used within the wind simulation experiment detailing the presence or absence of visual or scent flower components as well as the presence of simulated wind.

| Group | Condition                                                | Scented Flowers | Air Movement | Visual Cue | <i>n</i>                         |
|-------|----------------------------------------------------------|-----------------|--------------|------------|----------------------------------|
| A     | No air movement and unimodal scented flowers             | ✓               | ✗            | ✗          | 18 (Colony A: 7, Colony F: 11)   |
| B     | With air movement and unimodal scented flowers           | ✓               | ✓            | ✗          | 18 (Colony F: 10, Colony D: 8)   |
| C     | With air movement and bimodal scented and visual flowers | ✓               | ✓            | ✓          | 18 (Colony A: 10, Colony F: 8)   |
| D     | With air movement and unimodal visual flowers            | ✗               | ✓            | ✓          | 18 (Colony EE: 12, Colony FF: 6) |
