# Supplementary material for: Colour as a backup for scent in the presence of olfactory noise: testing the efficacy backup hypothesis using bumblebees (Bombus terrestris)
Source: R Soc Open Sci. 2017 Nov 29;4(11):170996. doi: 10.1098/rsos.170996 (PMC5717666; doi:10.1098/rsos.170996)
Supplement: Supplementary materials - Data [file rsos170996supp2.xlsx]

## Sheet: 1. Contents
Sheet No.	Experiment
2	Wind Simulation Data	Contains all data used for tests present within the paper in the form used.
3	Chemical Interference Data
4	Scent Preference Data	Includes data used in the scent preference tests presented in the paper

## Sheet: 2. Wind Simulation Data
condition	group	flower visits taken to reach learning criteria	number of correct choices made after landing	lands on rewarding flowers	colony	scent of rewarding flowers
No Wind Scented Flowers	A	17	37	28	A	lav
No Wind Scented Flowers	A	32	31	18	A	lav
No Wind Scented Flowers	A	23	31	22	F	lav
No Wind Scented Flowers	A	26	27	24	F	lav
No Wind Scented Flowers	A	18	28	26	F	lav
No Wind Scented Flowers	A	21	31	27	F	lav
No Wind Scented Flowers	A	14	28	25	F	lav
No Wind Scented Flowers	A	28	29	24	F	lav
No Wind Scented Flowers	A	11	35	26	F	lav
No Wind Scented Flowers	A	14	34	29	A	mint
No Wind Scented Flowers	A	11	39	36	A	mint
No Wind Scented Flowers	A	12	35	31	A	mint
No Wind Scented Flowers	A	10	36	34	A	mint
No Wind Scented Flowers	A	12	38	36	A	mint
No Wind Scented Flowers	A	15	32	28	F	mint
No Wind Scented Flowers	A	50	29	21	F	mint
No Wind Scented Flowers	A	20	33	27	F	mint
No Wind Scented Flowers	A	14	30	24	F	mint
With Wind Scented Flowers	B	42	24	23	F	mint
With Wind Scented Flowers	B	13	33	25	F	mint
With Wind Scented Flowers	B	19	28	30	F	mint
With Wind Scented Flowers	B	40	22	21	D	lav
With Wind Scented Flowers	B	14	30	24	D	lav
With Wind Scented Flowers	B	47	25	19	D	lav
With Wind Scented Flowers	B	24	23	25	D	lav
With Wind Scented Flowers	B	43	27	19	D	lav
With Wind Scented Flowers	B	24	26	26	D	lav
With Wind Scented Flowers	B	68	24	17	D	lav
With Wind Scented Flowers	B	34	30	22	D	lav
With Wind Scented Flowers	B	23	29	24	F	lav
With Wind Scented Flowers	B	21	27	26	F	lav
With Wind Scented Flowers	B	24	32	24	F	mint
With Wind Scented Flowers	B	22	27	22	F	mint
With Wind Scented Flowers	B	52	26	20	F	mint
With Wind Scented Flowers	B	23	30	22	F	mint
With Wind Scented Flowers	B	38	28	24	F	mint
With Wind Scented and Coloured Flowers	C	36	28	20	F	mint
With Wind Scented and Coloured Flowers	C	17	34	26	F	mint
With Wind Scented and Coloured Flowers	C	17	37	34	F	mint
With Wind Scented and Coloured Flowers	C	15	37	36	F	lav
With Wind Scented and Coloured Flowers	C	16	38	35	F	lav
With Wind Scented and Coloured Flowers	C	15	37	36	F	lav
With Wind Scented and Coloured Flowers	C	17	36	32	F	lav
With Wind Scented and Coloured Flowers	C	28	26	28	F	lav
With Wind Scented and Coloured Flowers	C	12	37	36	A	mint
With Wind Scented and Coloured Flowers	C	25	30	27	A	mint
With Wind Scented and Coloured Flowers	C	17	35	32	A	mint
With Wind Scented and Coloured Flowers	C	15	38	34	A	mint
With Wind Scented and Coloured Flowers	C	12	36	39	A	mint
With Wind Scented and Coloured Flowers	C	12	38	37	A	mint
With Wind Scented and Coloured Flowers	C	13	37	30	A	lav
With Wind Scented and Coloured Flowers	C	14	36	35	A	lav
With Wind Scented and Coloured Flowers	C	26	33	26	A	lav
With Wind Scented and Coloured Flowers	C	31	31	22	A	lav
With Wind Coloured Flowers	D	17	31	32	EE	no scent
With Wind Coloured Flowers	D	11	37	37	EE	no scent
With Wind Coloured Flowers	D	12	36	32	EE	no scent
With Wind Coloured Flowers	D	14	33	34	EE	no scent
With Wind Coloured Flowers	D	18	26	24	EE	no scent
With Wind Coloured Flowers	D	15	37	34	EE	no scent
With Wind Coloured Flowers	D	15	31	32	EE	no scent
With Wind Coloured Flowers	D	14	32	29	EE	no scent
With Wind Coloured Flowers	D	12	31	31	EE	no scent
With Wind Coloured Flowers	D	23	32	27	EE	no scent
With Wind Coloured Flowers	D	15	33	27	EE	no scent
With Wind Coloured Flowers	D	36	29	24	EE	no scent
With Wind Coloured Flowers	D	33	23	23	FF	no scent
With Wind Coloured Flowers	D	16	32	29	FF	no scent
With Wind Coloured Flowers	D	26	34	30	FF	no scent
With Wind Coloured Flowers	D	17	33	26	FF	no scent
With Wind Coloured Flowers	D	19	27	29	FF	no scent
With Wind Coloured Flowers	D	16	37	30	FF	no scent

## Sheet: 3. Chemical Interference Data
condition	group	flower visits taken to reach learning criteria	number of correct choices made after landing	lands on rewarding flowers	colony	scent of rewarding flowers
No interference unimodal: scented	A	12	39		C	lavender
No interference unimodal: scented	A	15	36		C	lavender
No interference unimodal: scented	A	11	38		C	lavender
No interference unimodal: scented	A	11	39		C	lavender
No interference unimodal: scented	A	24	34		C	lavender
No interference unimodal: scented	A	11	40		C	lavender
No interference unimodal: scented	A	22	32		D	lavender
No interference unimodal: scented	A	15	35		D	lavender
No interference unimodal: scented	A	14	37		D	lavender
No interference unimodal: scented	A	26	32		D	mint
No interference unimodal: scented	A	16	36		D	mint
No interference unimodal: scented	A	11	36		D	mint
No interference unimodal: scented	A	18	35		D	mint
No interference unimodal: scented	A	21	32		D	mint
No interference unimodal: scented	A	25	33		D	mint
No interference unimodal: scented	A	12	35		D	mint
No interference unimodal: scented	A	29	34		D	mint
No interference unimodal: scented	A	18	34		D	mint
Interference - unimodal: scented	B	15	22		D	lavender
Interference - unimodal: scented	B	40	22		D	lavender
Interference - unimodal: scented	B	17	31		D	lavender
Interference - unimodal: scented	B	24	30		D	lavender
Interference - unimodal: scented	B	19	32		D	lavender
Interference - unimodal: scented	B	36	26		D	lavender
Interference - unimodal: scented	B	24	29		D	lavender
Interference - unimodal: scented	B	17	29		D	lavender
Interference - unimodal: scented	B	27	33		D	lavender
Interference - unimodal: scented	B	30	27		C	mint
Interference - unimodal: scented	B	14	33		C	mint
Interference - unimodal: scented	B	15	34		C	mint
Interference - unimodal: scented	B	20	32		C	mint
Interference - unimodal: scented	B	32	31		D	mint
Interference - unimodal: scented	B	40	19		D	mint
Interference - unimodal: scented	B	40	24		D	mint
Interference - unimodal: scented	B	20	32		D	mint
Interference - unimodal: scented	B	40	28		D	mint
Interference - bimodal	C	12	38		D	lavender
Interference - bimodal	C	12	39		D	lavender
Interference - bimodal	C	11	38		D	lavender
Interference - bimodal	C	16	37		D	lavender
Interference - bimodal	C	10	39		D	lavender
Interference - bimodal	C	12	39		D	lavender
Interference - bimodal	C	21	35		D	lavender
Interference - bimodal	C	11	36		D	lavender
Interference - bimodal	C	29	27		D	lavender
Interference - bimodal	C	23	34		D	mint
Interference - bimodal	C	22	32		D	mint
Interference - bimodal	C	13	35		D	mint
Interference - bimodal	C	20	31		D	mint
Interference - bimodal	C	19	35		D	mint
Interference - bimodal	C	14	35		D	mint
Interference - bimodal	C	11	34		D	mint
Interference - bimodal	C	15	37		D	mint
Interference - bimodal	C	15	40		D	mint
Interference - unimodal: visual	D	10	37		CC	no scent
Interference - unimodal: visual	D	13	39		CC	no scent
Interference - unimodal: visual	D	23	30		CC	no scent
Interference - unimodal: visual	D	14	36		CC	no scent
Interference - unimodal: visual	D	35	22		DD	no scent
Interference - unimodal: visual	D	12	36		DD	no scent
Interference - unimodal: visual	D	15	27		F	no scent
Interference - unimodal: visual	D	18	32		DD	no scent
Interference - unimodal: visual	D	18	33		DD	no scent
Interference - unimodal: visual	D	40	15		DD	no scent
Interference - unimodal: visual	D	21	30		DD	no scent
Interference - unimodal: visual	D	14	36		DD	no scent
Interference - unimodal: visual	D	23	32		DD	no scent
Interference - unimodal: visual	D	29	27		E	no scent
Interference - unimodal: visual	D	33	25		E	no scent
Interference - unimodal: visual	D	18	39		E	no scent
Interference - unimodal: visual	D	18	30		E	no scent
Interference - unimodal: visual	D	39	24		CCC	no scent

## Sheet: 4. Scent Preference Data
number of lands on mint flowers in preference tests (out of 20)	number of lands on lavendar flowers in preference tests (out of 20)
7	13
9	11
5	15
11	9
8	12
4	16
12	8
10	10
12	8
7	13
7	13
11	9
6	14
9	11
13	7
